# Supplementary material for: Assessing the effect of insecticide-treated cattle on tsetse abundance and trypanosome transmission at the wildlife-livestock interface in Serengeti, Tanzania
Source: PubMed Central journal article supplement (PMC7473525; doi:10.1371/journal.pntd.0008288), 2020-08-25
Supplement: pntd.0008288.s007.pdf [file pntd.0008288.s007.pdf]

## Tsetse population dynamics

We model changes in the numbers of adult tsetse and pupae over time and space on a lattice using two recursion equations. Movement of adult tsetse is assumed to be random and is approximated by a diffusion process, as previously described by Hargrove (2003).

Changes in the number of adults ( $A$ ) at time  $t$  in cell  $i, j$  are described by:

$$A_{(i,j,t+1)} = (A_{(i,j,t)} + aC)(1 - \mu_B) + \beta P_{(i,j,t)} \quad (1)$$

where  $C = A_{(i,j-1,t)} + A_{(i-1,j,t)} + A_{(i,j+1,t)} + A_{(i+1,j,t)} - 4A_{(i,j,t)}$  and  $P_{(i,j,t)}$  is the number of pupae at time  $t$  in cell  $i, j$ . Each day, adults move to an adjacent cell with probability  $a$  and  $\beta$  represents the proportion of the pupal population emerging as adults on any given day. A proportion of adults ( $\mu_B$ ) then die due to natural, density-independent causes.

Changes in numbers of pupae are described by:

$$P_{(i,j,t+1)} = P_{(i,j,t)}(1 - \beta)(1 - \mu_P)(1 - P_{(i,j,t)}(1 - \beta P_{(i,j,t)})(1 - \mu_P)\delta) + lA_{(i,j,t)}/2 \quad (2)$$

where  $l$  is the proportion of females larvipositing each day and  $\mu_P$  is the proportion of pupae which die each day due to density-independent processes. In addition pupal deaths result from density-dependent mortality, implemented using the coefficient  $\delta$ .

We include additional adult tsetse mortality ( $\mu_F$ ) for tsetse in cells modelled as ‘farming areas’ where  $\mu_F$  is a matrix with increased mortality ( $> 0$ ) in cells  $i, f_1 \geq j \leq f_2$  and zero otherwise so that Eq. 1 therefore becomes:

$$A_{(i,j,t+1)} = (A_{(i,j,t)} + aC)(1 - \mu_B)(1 - \mu_F) + \beta P_{(i,j,t)} \quad (3)$$

## Tsetse population and trypanosome transmission dynamics

We extend the model in Eq. 2 and 3 to include trypanosome transmission. We use a single-vector, single-host system.

Our model assumptions generally follow those described by Rogers (1998) and Hargrove et al. (2012), except that we allow for a probability  $> 0$  that non-teneral tsetse – flies that have taken at least one bloodmeal – can become infected with *T. brucei*, and for a decreased probability of infection with *T. congolense* for non-teneral flies, based on laboratory studies including Welburn and Maudlin (1992) and Kubi et al. (2006).

Each day, a proportion  $\beta_H$  of total hosts ( $N_H$ ) in each cell produce offspring, which are susceptible ( $S_H$ ). Susceptible hosts become exposed ( $E_H$ ) with probability  $\lambda_H$ . Exposed hosts become infectious with probability  $\sigma_H$  and infected individuals ( $I_H$ ) recover with probability  $\varphi$ . Recovered hosts ( $R_H$ ) lose immunity and become susceptible with probability  $\gamma$ . All hosts die with probability  $\mu_H$ .

Hosts:

$$S_{H(i,j,t+1)} = S_{H(i,j,t)}(1 - \lambda_H)(1 - \mu_H) + \gamma R_{H(i,j,t)}(1 - \mu_H) + \beta_H N_{H(i,j,t)} \quad (4)$$

$$E_{H(i,j,t+1)} = E_{H(i,j,t)}(1 - \sigma_H)(1 - \mu_H) + \lambda_H S_{H(i,j,t)}(1 - \mu_H) \quad (5)$$

$$I_{H(i,j,t+1)} = I_{H(i,j,t)}(1 - \varphi)(1 - \mu_H) + \sigma_H E_{H(i,j,t)}(1 - \mu_H) \quad (6)$$

$$R_{H(i,j,t+1)} = R_{H(i,j,t)}(1 - \gamma)(1 - \mu_H) + \varphi I_{H(i,j,t)}(1 - \mu_H) \quad (7)$$

where  $\lambda_H = 1 - (1 - 1/N_H)^{\alpha I_V p_H}$  where  $\alpha$  the daily probability of tsetse biting and  $I_V$  the number of infectious tsetse.

Vectors:

In addition to tsetse reproduction, death and movement as described above, each day teneral (unfed) tsetse leave the susceptible teneral ( $S_V$ ) class with probability  $\alpha$  – the probability of taking a blood meal. A proportion  $\lambda_{VS}$  of these flies become exposed ( $E_{1V}$ ), depending on the proportion of infected hosts and the probability  $p_S$  of becoming infected given an bite on an infected host, and the rest become susceptible non-teneral  $G_V$ . Susceptible non-teneral flies have probability  $p_G$  of becoming infected given a bite on an infected host. Infected flies move through three ‘exposed’ classes each with probability  $3\sigma_V$  before developing a mature infection ( $I_V$ ).

$$S_{V(i,j,t+1)} = (S_{V(i,j,t)} + aC_S)(1 - \alpha)(1 - \mu_B)(1 - \mu_F) + \beta P_{(i,j,t)} \quad (8)$$

$$E_{1V(i,j,t+1)} = (E_{1V(i,j,t)} + aC_{E1})(1 - 3\sigma_V)(1 - \mu_B)(1 - \mu_F) \\ + \lambda_{VS}(S_{V(i,j,t)} + aC_S) + \lambda_{VG}(G_{V(i,j,t)} + aC_G) \quad (9)$$

$$E_{2V(i,j,t+1)} = (E_{2V(i,j,t)} + aC_{E2})(1 - 3\sigma_V)(1 - \mu_B)(1 - \mu_F) + 3\sigma_V(E_{1V(i,j,t)} + aC_{E1}) \quad (10)$$

$$E_{3V(i,j,t+1)} = (E_{3V(i,j,t)} + aC_{E3})(1 - \mu_B)(1 - \mu_F)(1 - 3\sigma_V) + 3\sigma_V(E_{2V(i,j,t)} + aC_{E2}) \quad (11)$$

$$I_{V(i,j,t+1)} = (I_{V(i,j,t)} + aC_I)(1 - \mu_B)(1 - \mu_F) + 3\sigma_V(E_{3V(i,j,t)} + aC_{E3}) \quad (12)$$

$$G_{V(i,j,t+1)} = (G_{V(i,j,t)} + aC_G)(1 - \lambda_{VG})(1 - \mu_B)(1 - \mu_F) + (1 - \lambda_{VS})(S_{V(i,j,t)} + aC_S) \quad (13)$$

$$P_{(i,j,t+1)} = (P_{(i,j,t)} - \beta P_{(i,j,t)})(1 - \mu_P)(1 - (P_{(i,j,t)} - \beta P_{(i,j,t)})(1 - \mu_P)\delta) + lN_{V(i,j,t)}/2 \quad (14)$$

where  $\lambda_{VS} = \alpha p_S I_H / N_H$  and  $\lambda_{VG} = \alpha p_G I_H / N_H$ .

## References

Welburn SC and Maudlin, I (1992). The nature of the teneral state in *Glossina* and its role in the acquisition of trypanosome infection in tsetse. *Ann. Trop. Med. Parasitol.* 86, 529 – 536.

Rogers DJ (1998). A general model for the African trypanosomiases. *Parasitology.* 97,193 – 212.

Hargrove JW (2003). Optimized simulation of the control of tsetse flies *Glossina pallidipes* and *G. m. morsitans* (Diptera: Glossinidae) using odour-baited targets in Zimbabwe. *Bull. Ent. Res.* 93(1), 19 – 29.

Kubi C, Van Den Abbeele J, De Deken R, Marcotty T, Dorny P, van Den Bossche P. (2006). The effect of starvation on the susceptibility of teneral and non-teneral tsetse flies to trypanosome infection. *Med. Vet. Entomol.* 20, 388 – 392.

Hargrove JW, Ouifki R, Kajunguri D, Vale GA and Torr SJ (2012). Modeling the control of trypanosomiasis using trypanocides or insecticide-treated livestock. *PLoS NTD.* Vol. 6(5),e1615.
